# Supplementary material for: Re and99mTc organometallic complexes containing pendant l-arginine derivatives as potential probes of inducible nitric oxide synthase
Source: Royal Society of Chemistry journal article supplement (doi:10.1039/b805986a), 2008-10-23

# Supporting Information for

## **Re and <sup>99m</sup>Tc Organometallic Complexes Containing Pendant L-Arginine Derivatives as Potencial Probes of Inducible Nitric Oxide Synthase**

Bruno L. Oliveira,<sup>a</sup> João D. G. Correia,<sup>\*a</sup> Paula D. Raposinho,<sup>a</sup> Isabel Santos,<sup>a</sup> António Ferreira,<sup>b</sup> Carlos  
Cordeiro,<sup>b</sup> Ana P. Freire<sup>b</sup>

<sup>a</sup>*Departamento de Química, ITN, Estrada Nacional 10, 2686-953 Sacavém, Portugal.*

<sup>b</sup>*Centro de Química e Bioquímica, Departamento de Química e Bioquímica, Faculdade de  
Ciências da Universidade de Lisboa, Portugal.*

- Phone: + 351-21-9946233. Fax: + 351-21-9946185.
- E-mail: [jgalamba@itn.pt](mailto:jgalamba@itn.pt)

\* To whom correspondence should be addressed

**Figure 1** -  $^1\text{H}$ - $^1\text{H}$ -COSY spectrum of complex **2** (mixture of *isomers a* and *b*) with peak assignment ( $\text{D}_2\text{O}$ ).

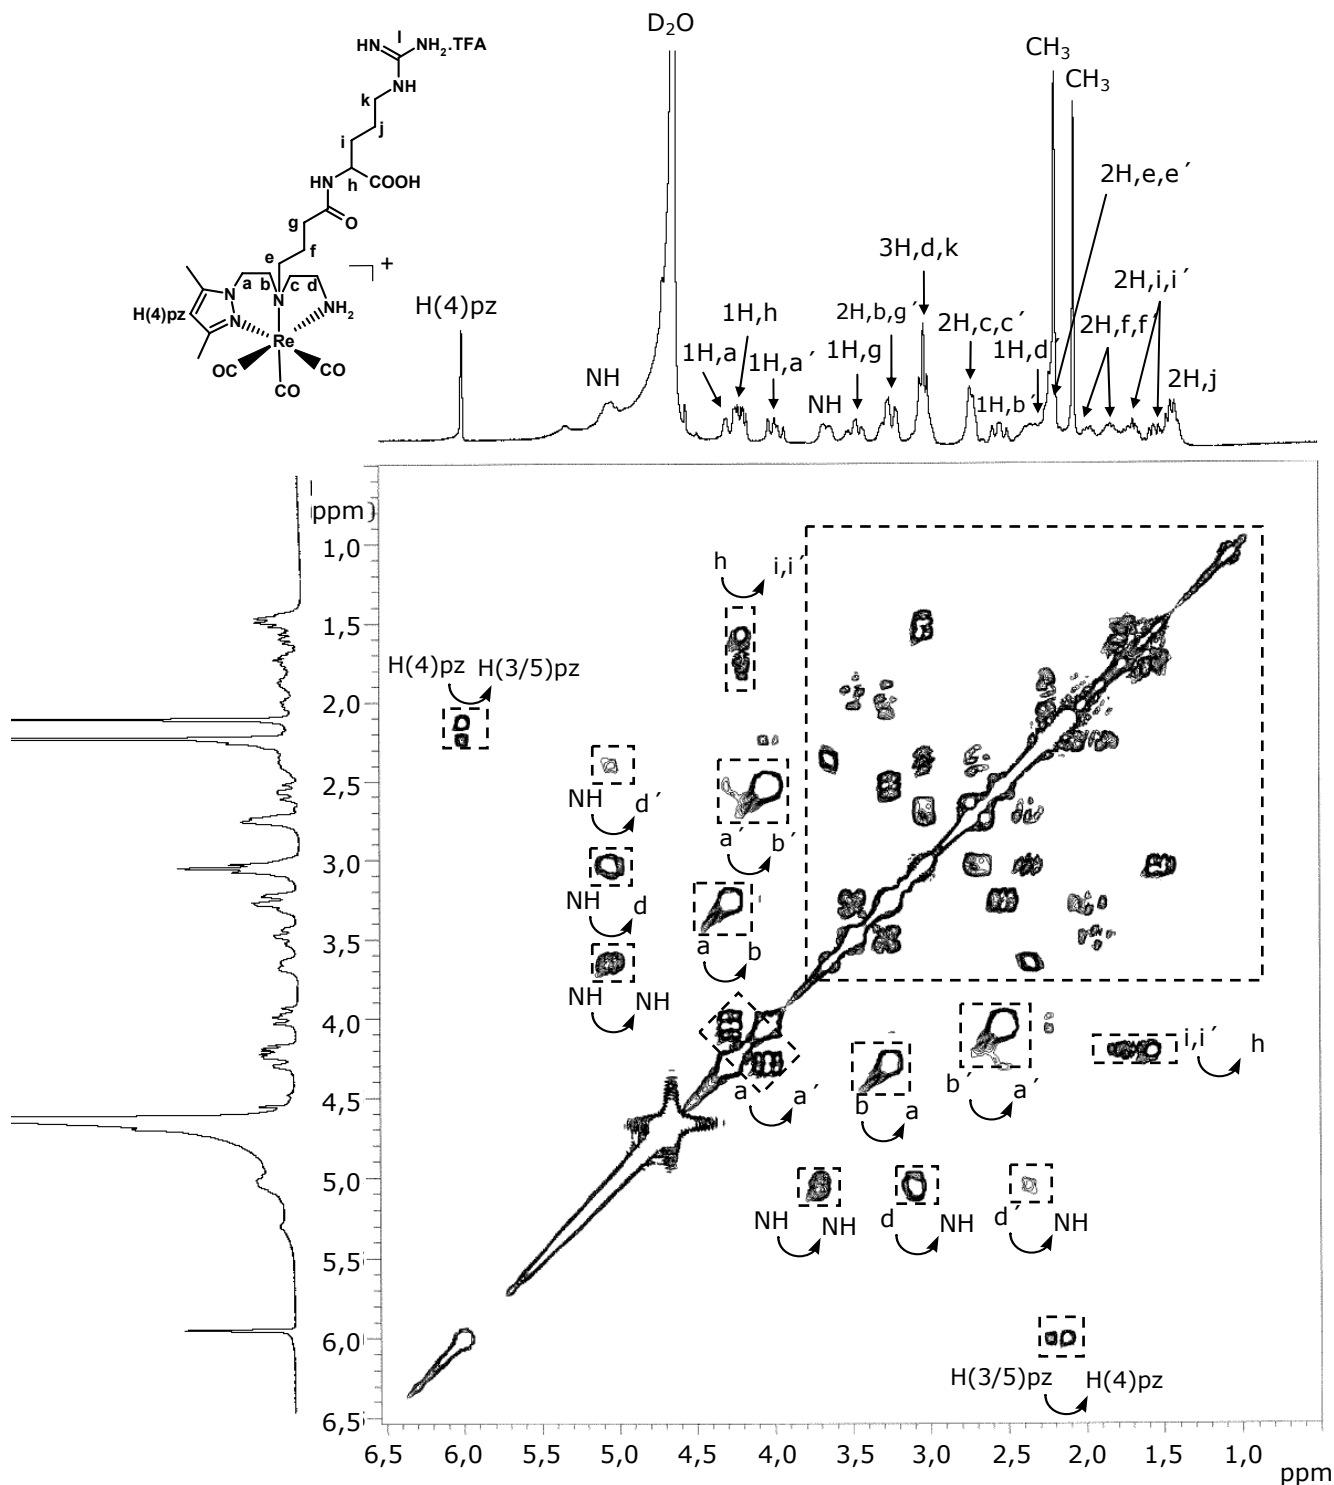

Figure 2 - Expanded region of the  $^1\text{H}$ - $^1\text{H}$ -COSY spectrum of complex **2** (mixture of *isomers a* and *b*) ( $\text{D}_2\text{O}$ ).

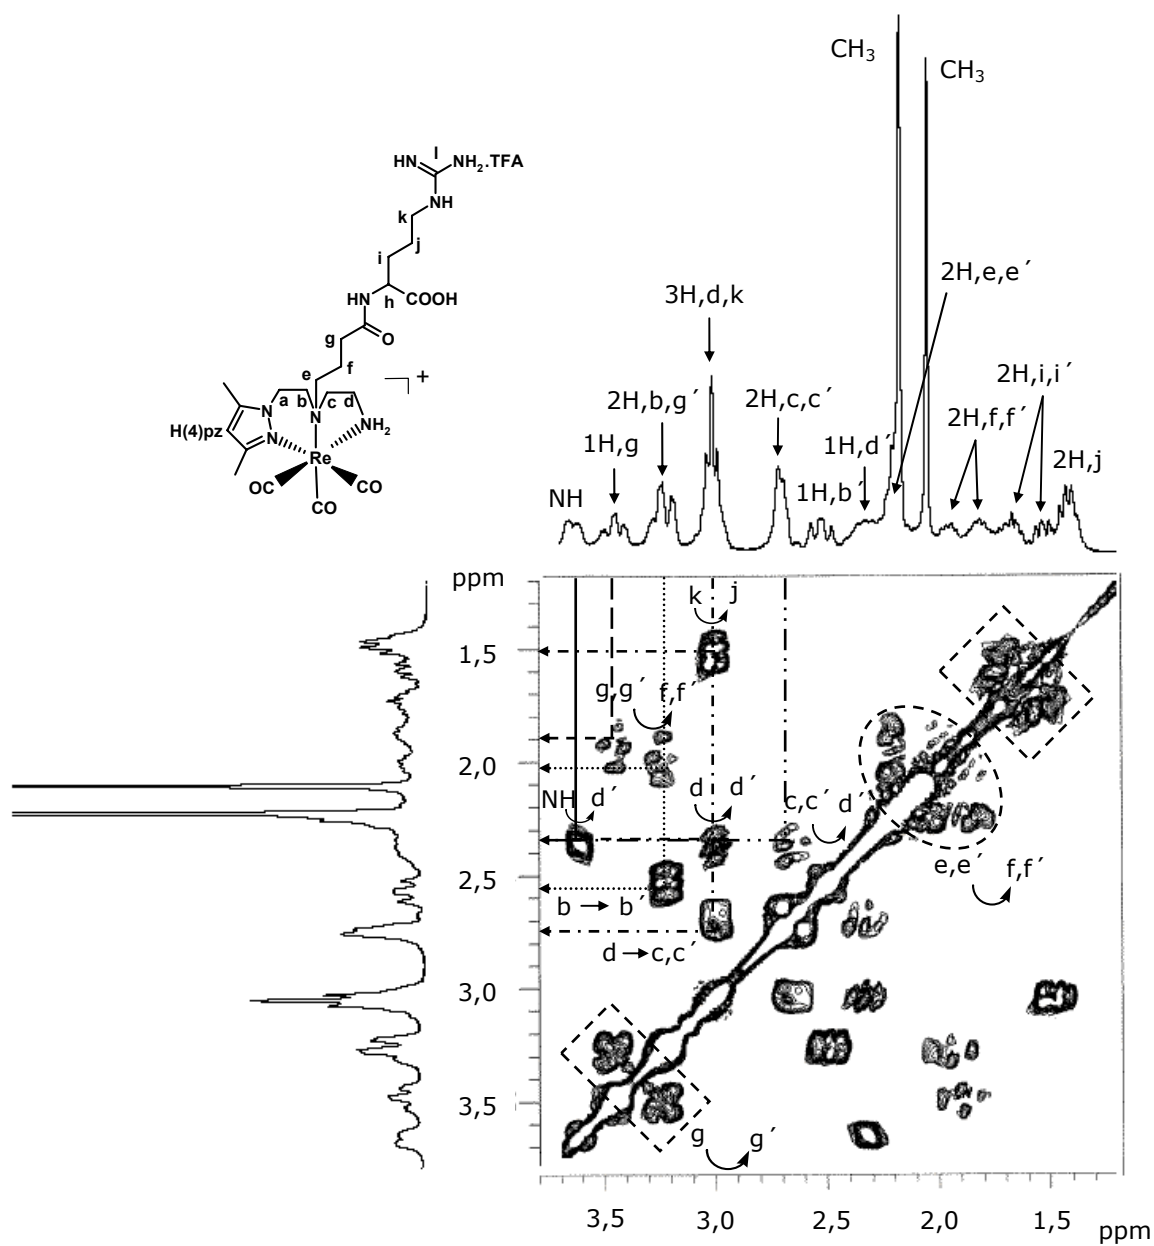

Figure 3 -  $^1\text{H}$ - $^{13}\text{C}$ -HSQC spectrum of complex **2** (mixture of *isomers a* and *b*) ( $\text{D}_2\text{O}$ ).

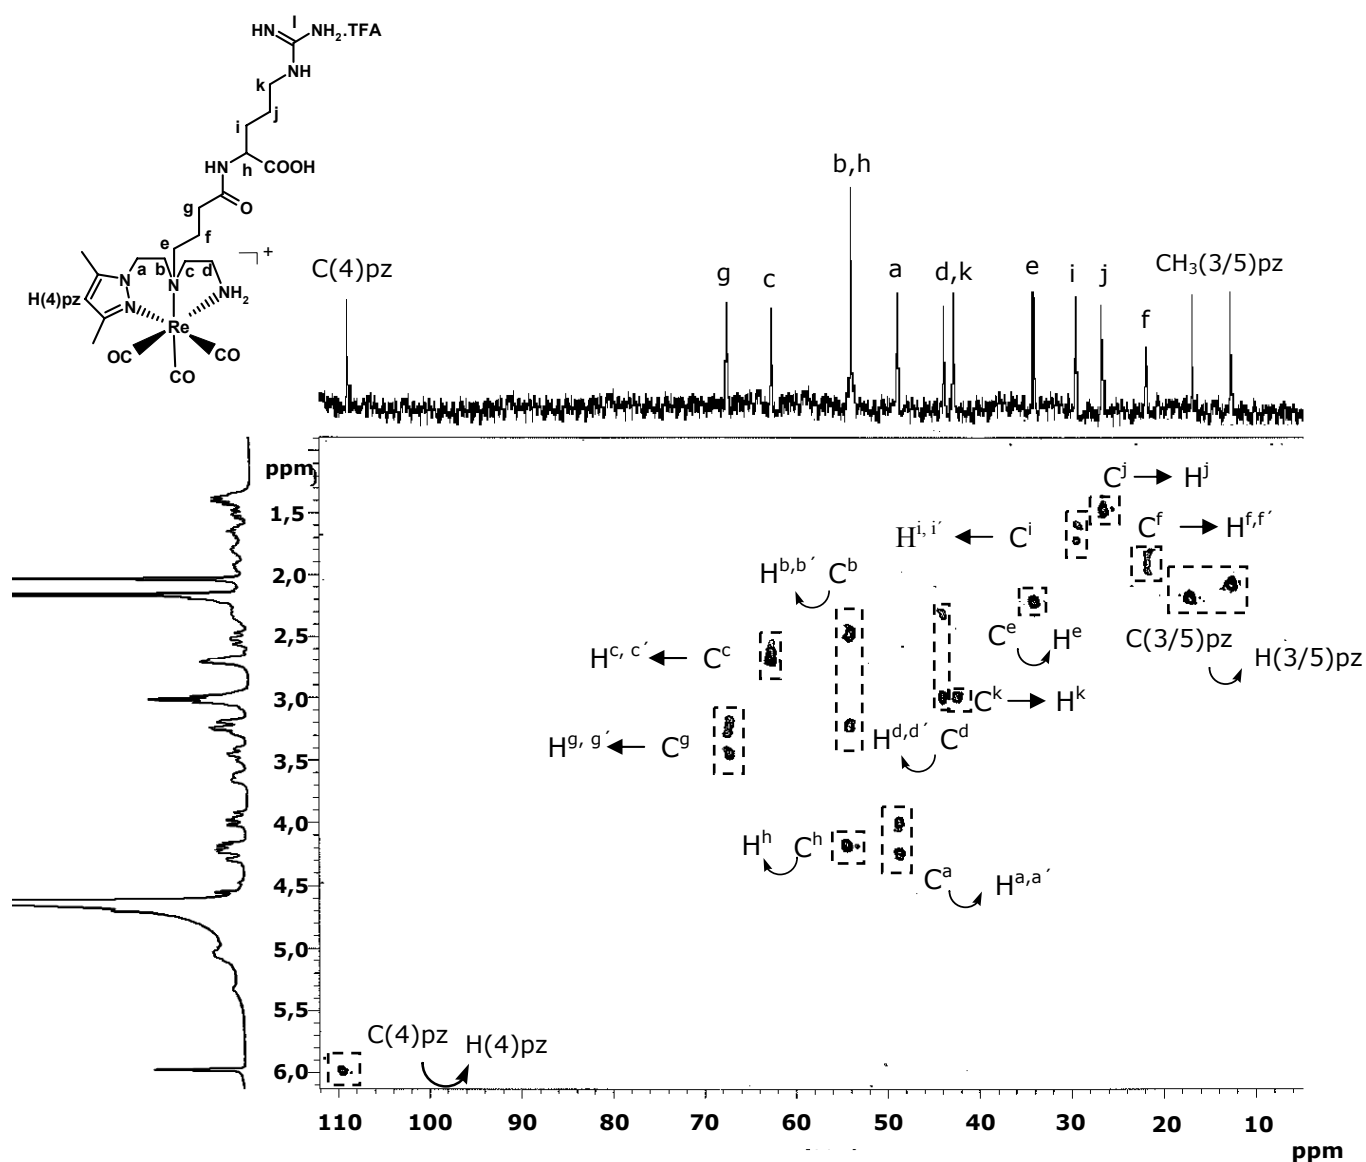

**Figure 4** -  $^{13}\text{C}$ -NMR spectrum of complex **2** (mixture of *isomers a* and *b*) ( $\text{D}_2\text{O}$ ).

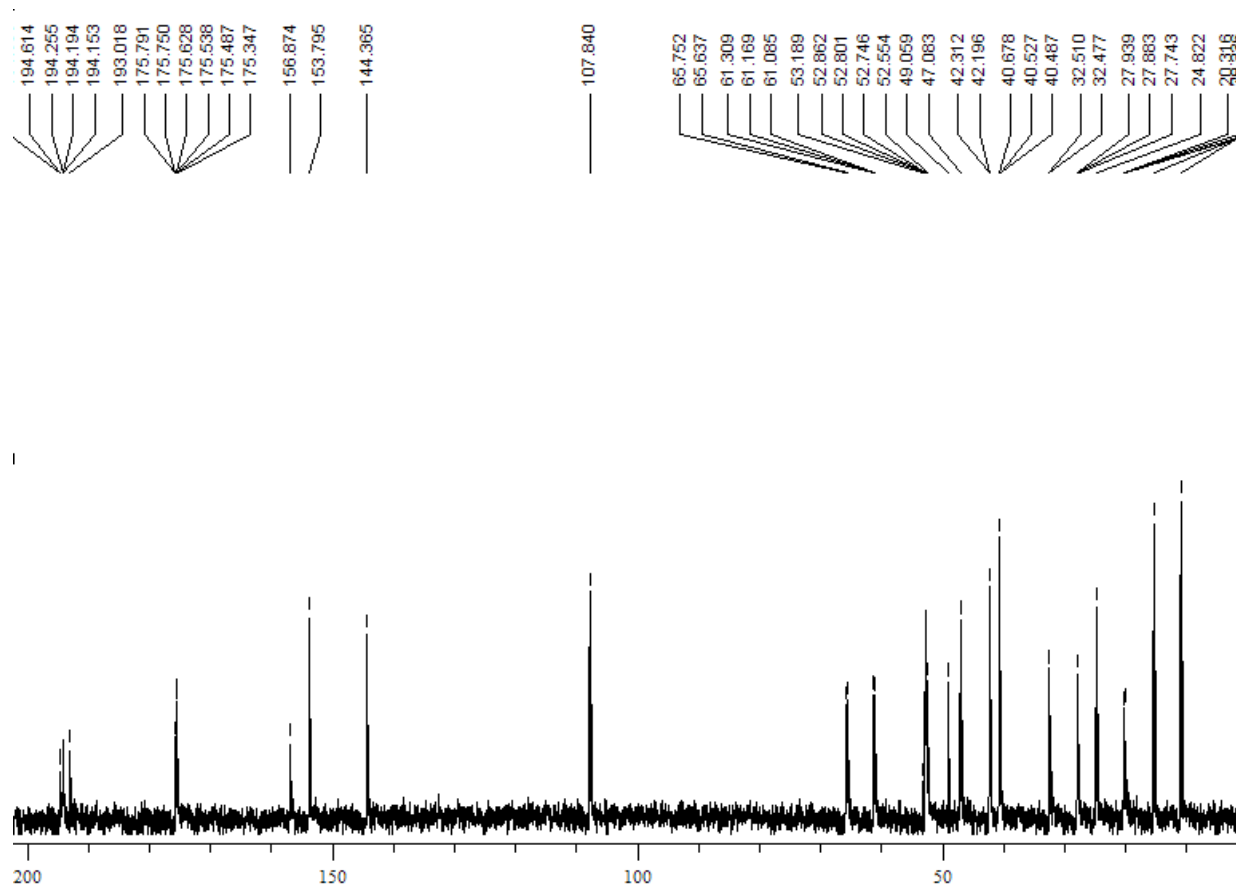

**Figure 5** - Expanded region of the  $^{13}\text{C}$ -NMR spectrum of complex **2** (mixture of *isomers a* and *b*) ( $\text{D}_2\text{O}$ ).

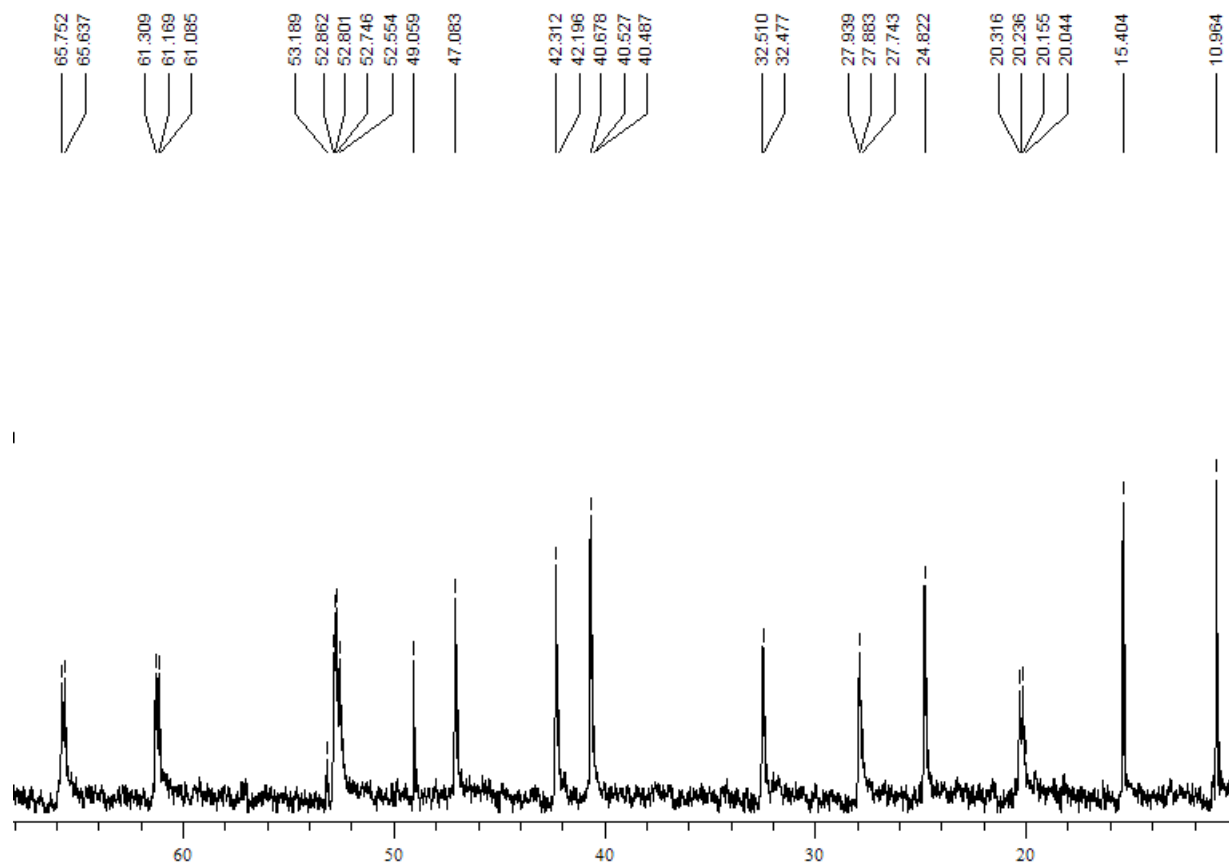

**Figure 6** -  $^{13}\text{C}$ -NMR spectrum of *isomer a* of the complex **2** ( $\text{D}_2\text{O}$ ) with expanded region.

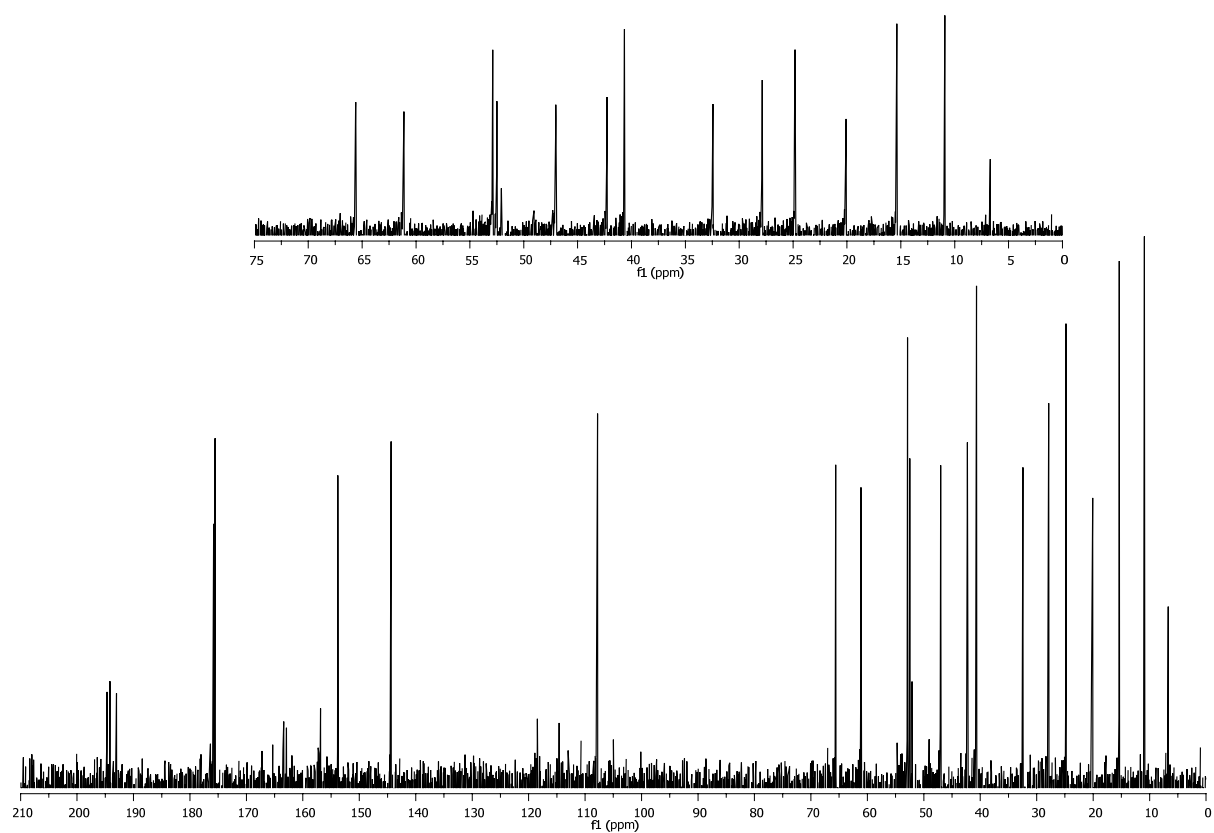

**Figure 7** -  $^1\text{H}$ NMR spectrum of *isomer a* of the complex **2** ( $\text{D}_2\text{O}$ ).

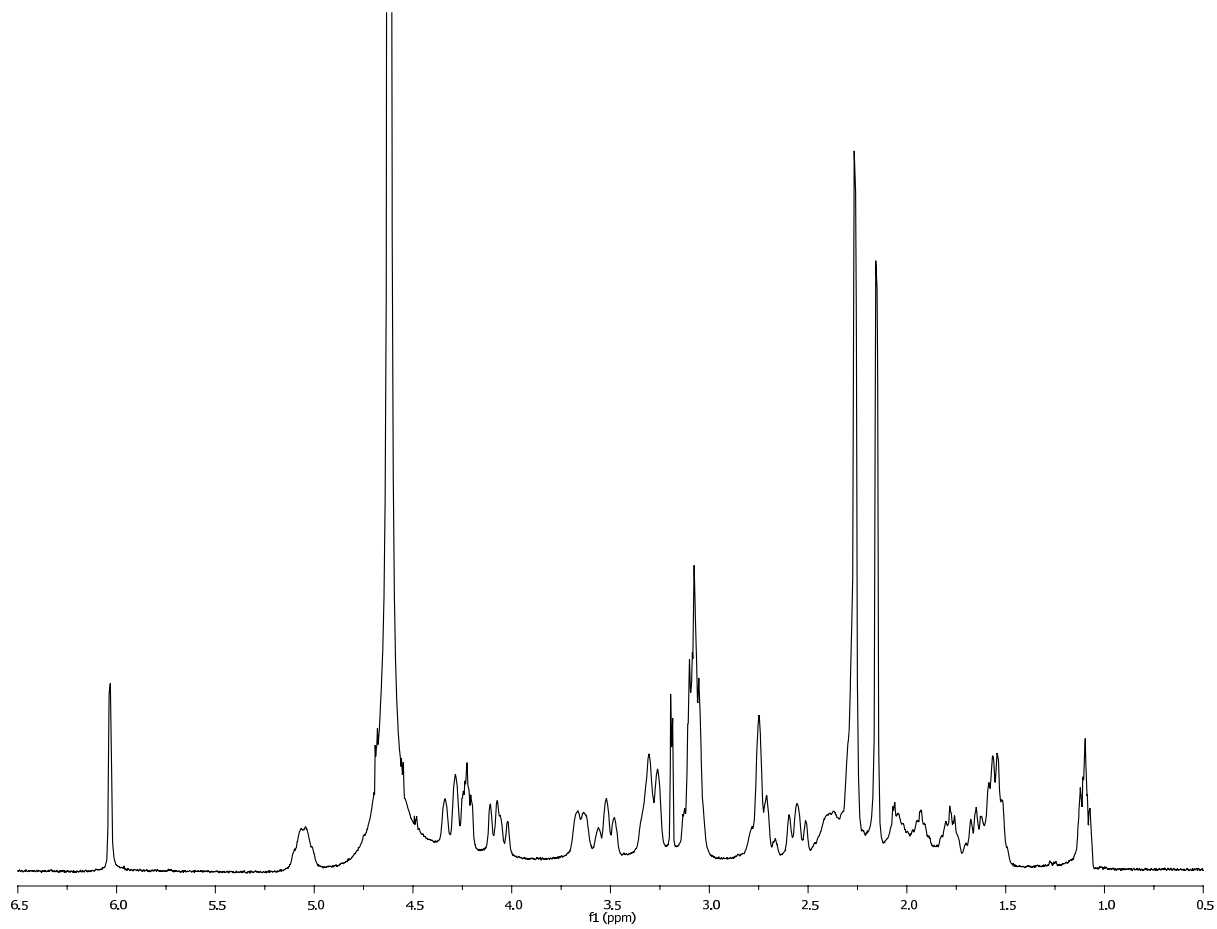



**Figure 8** -  $^{13}\text{C}$ -NMR spectrum of *isomer b* of the complex **2** ( $\text{D}_2\text{O}$ ) with expanded region.

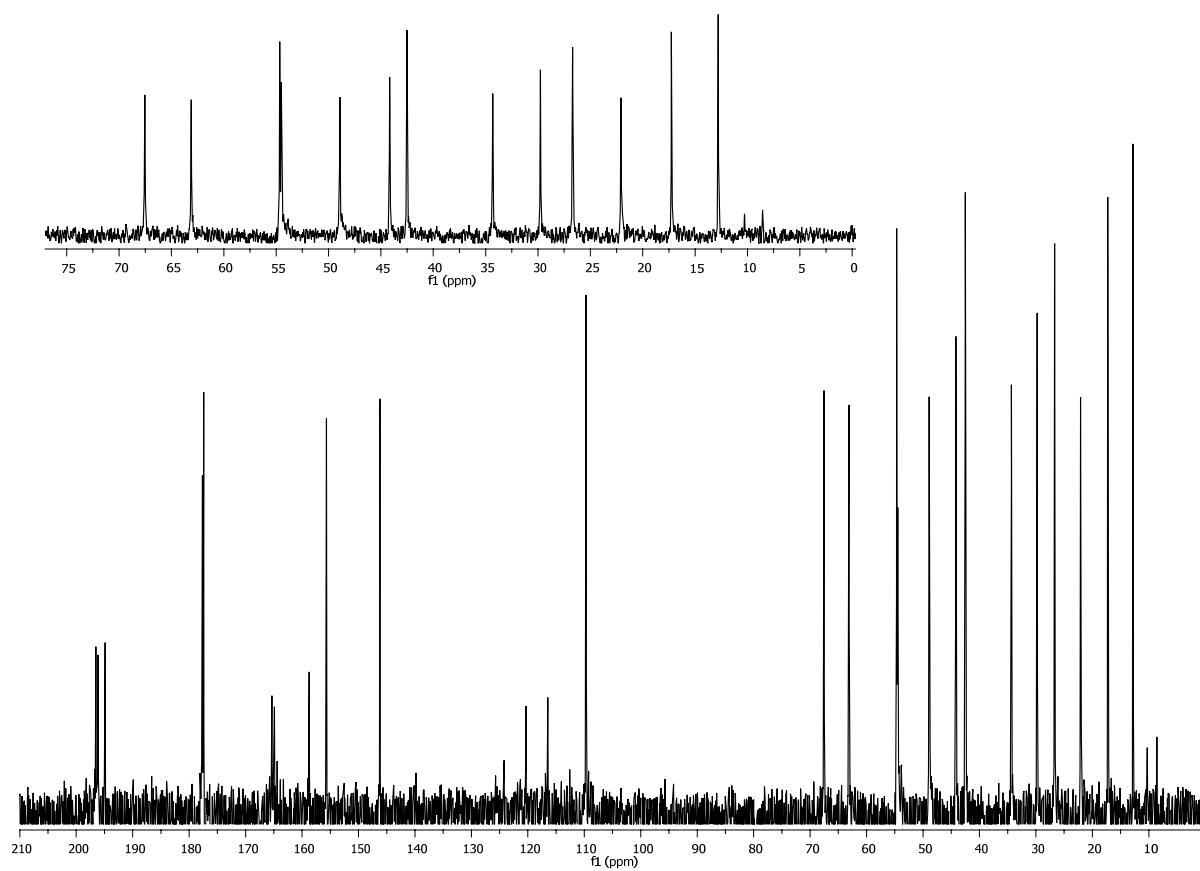

**Figure 9** -  $^1\text{H}$ -NMR spectrum of *isomer b* of complex **2** ( $\text{D}_2\text{O}$ ).

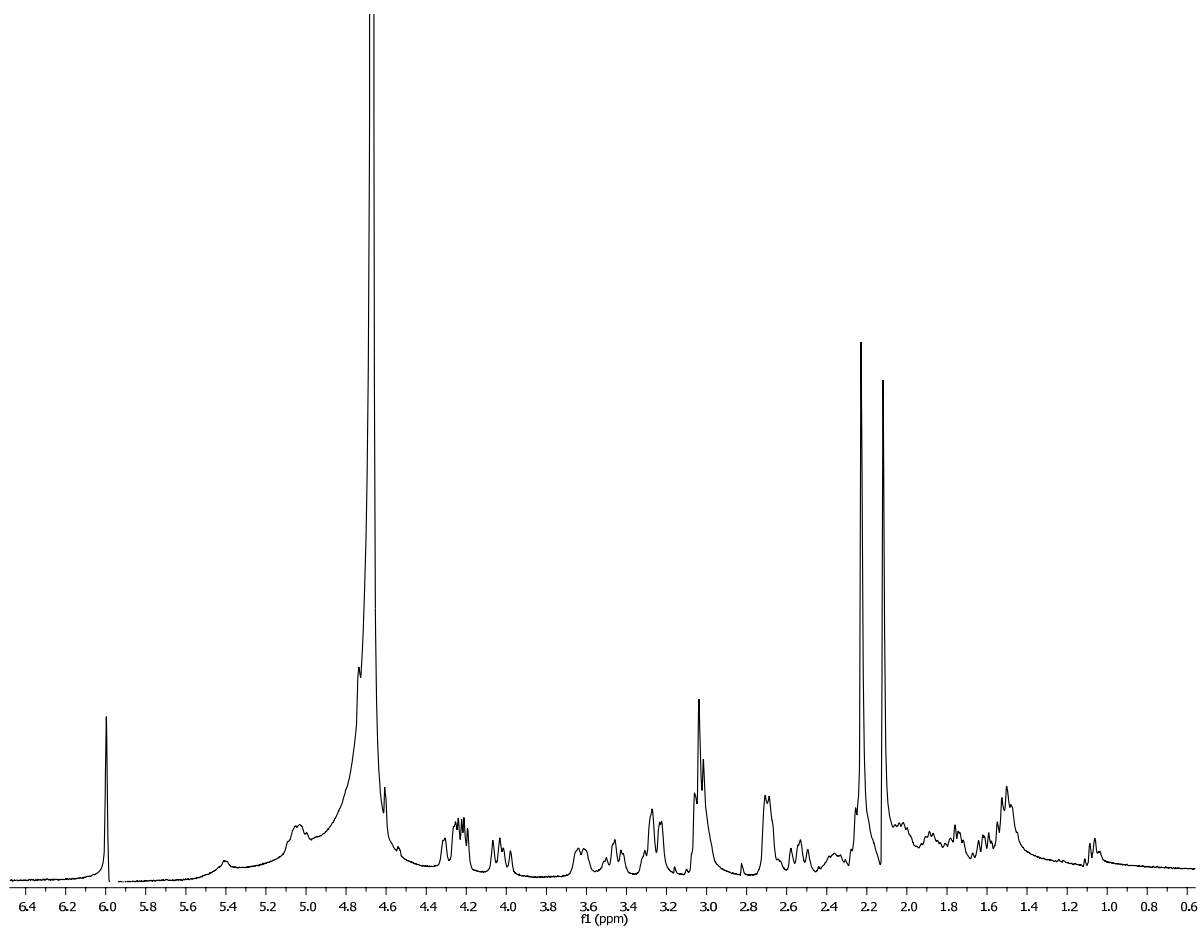

**Figure 10** -  $^{13}\text{C}$ -NMR spectrum of complex **4** (mixture of isomers) with expanded regions ( $\text{D}_2\text{O}$  with dioxane reference).

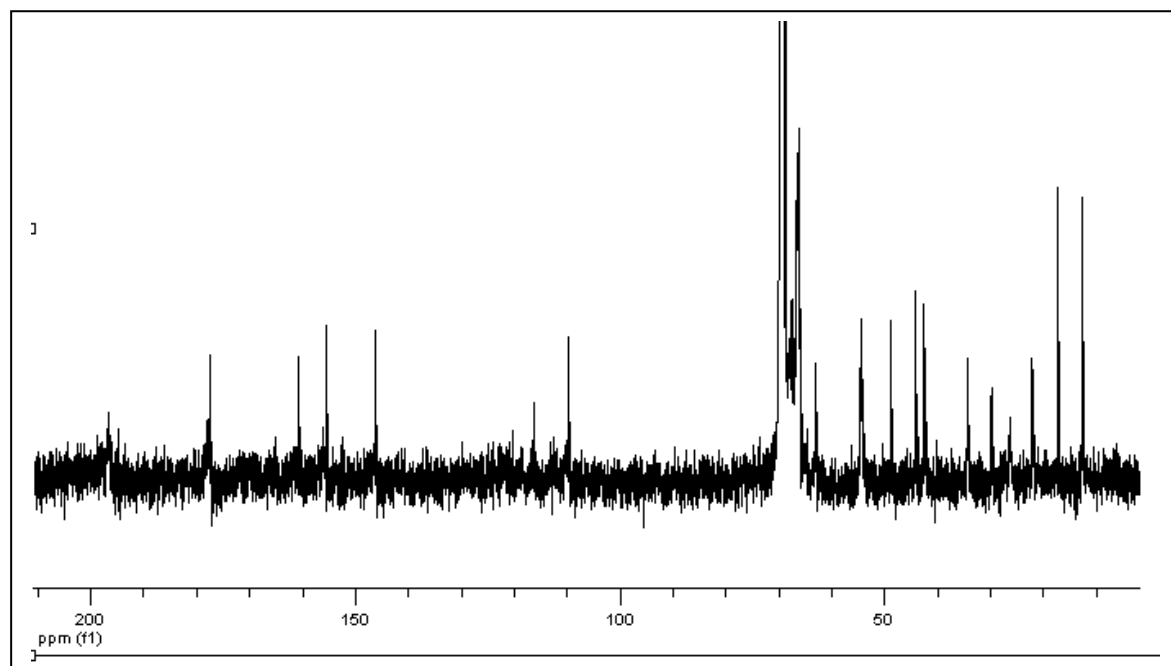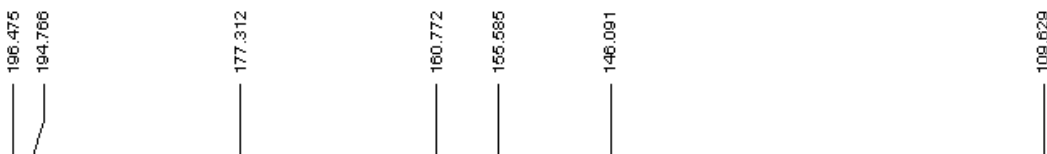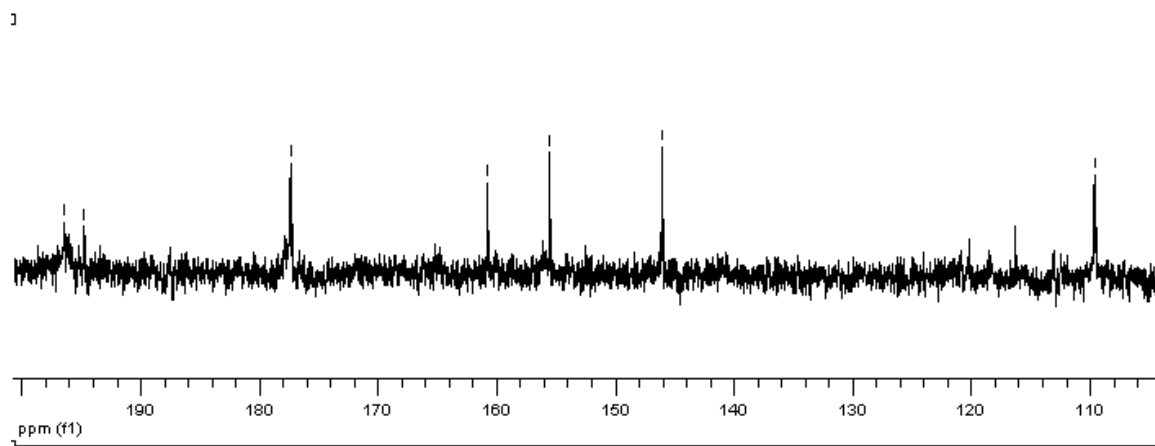

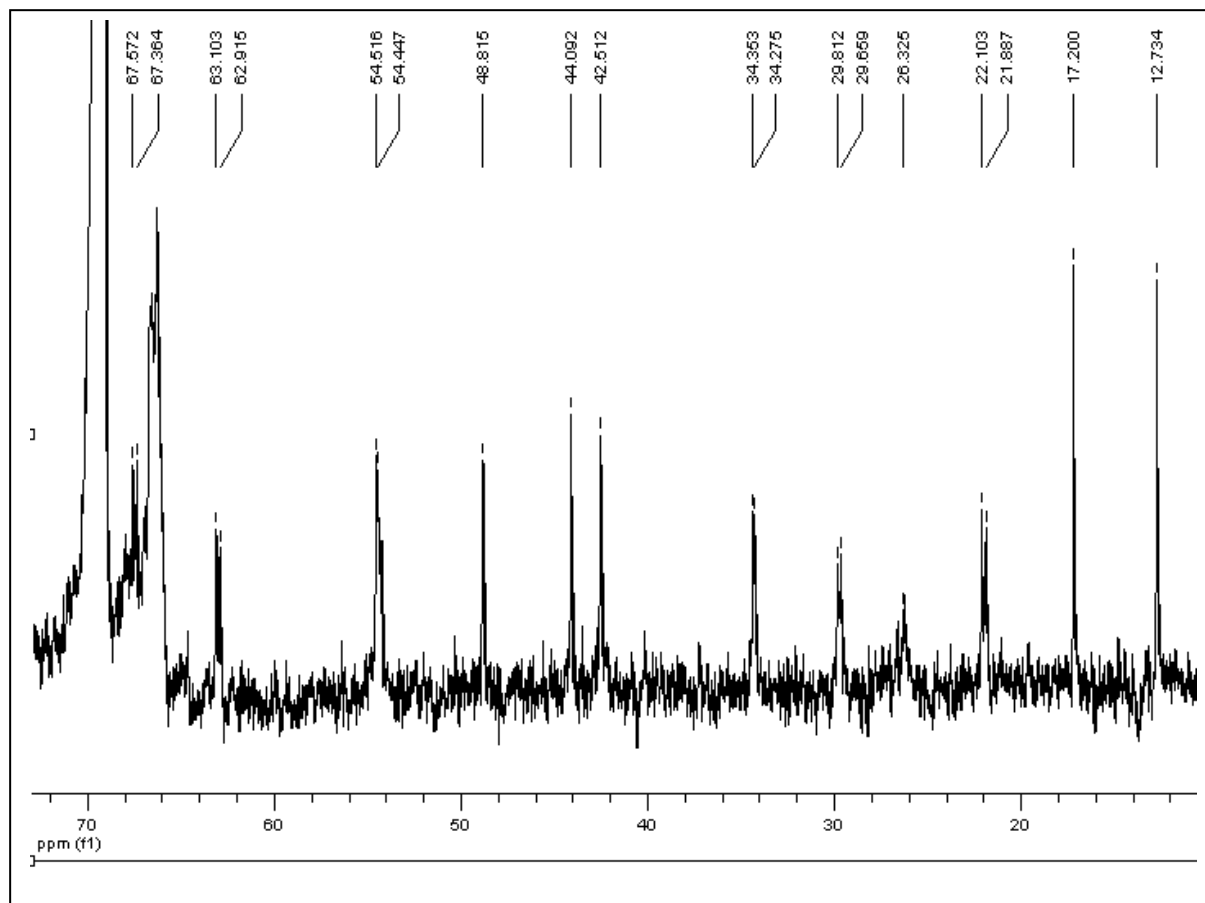

**Figure 11** – Full  $^{13}\text{C}$ -NMR spectrum of complex **5** (mixture of isomers) ( $\text{D}_2\text{O}$ ).

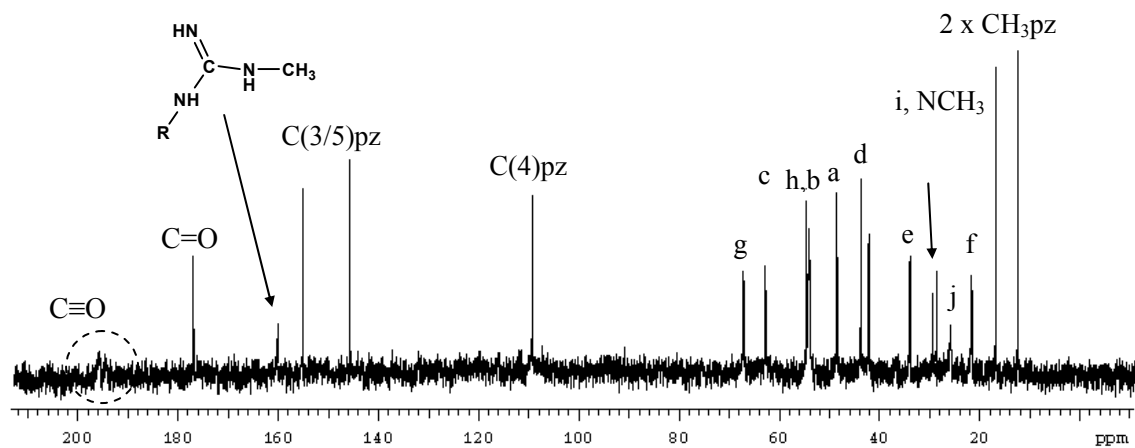

**Figure 12** – High-field region of a  $^{13}\text{C}$ -NMR spectrum of complex **5** (mixture of isomers) ( $\text{D}_2\text{O}$ ).

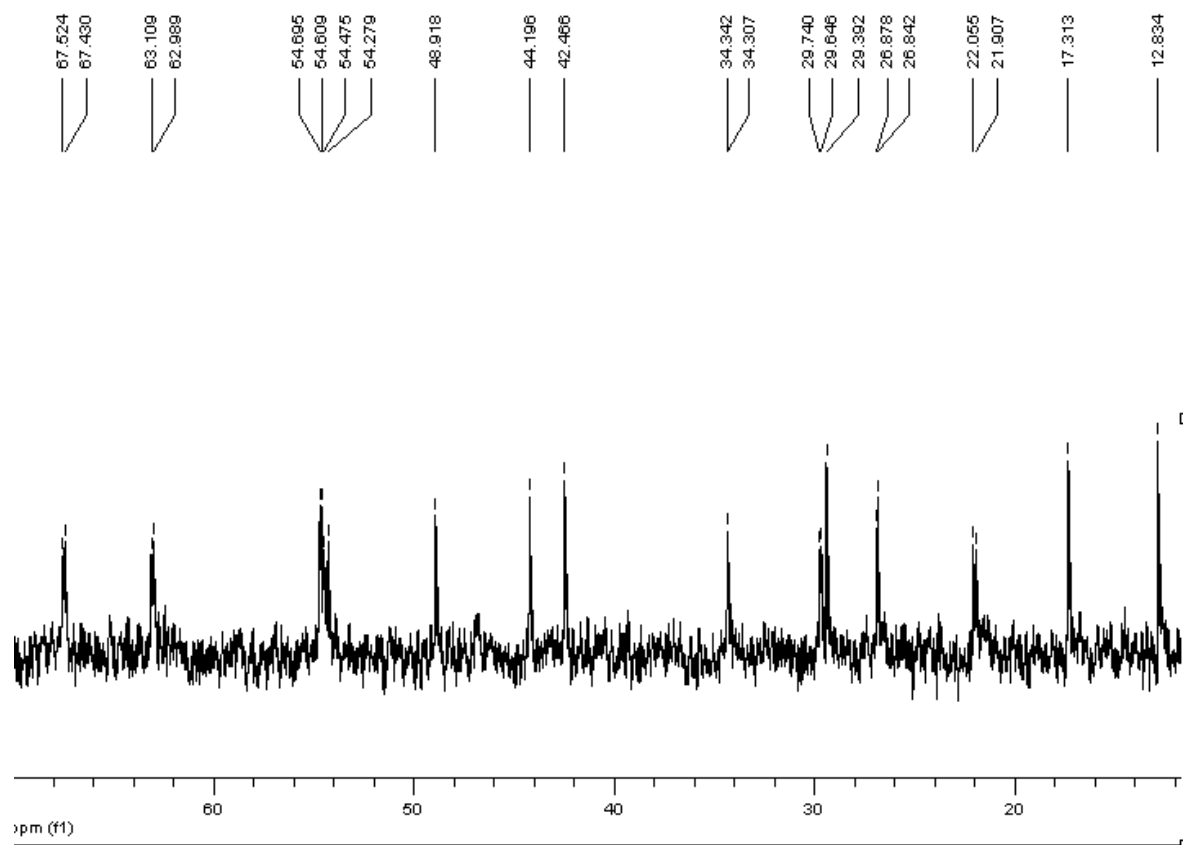

Supplement: b805986a.pdf [file b805986a.pdf]
